1        **The association between body roundness index and kidney**  
2                    **stones in a diabetic population: NHANES 2011–2018**

3                    Chongsong Cui<sup>1,†</sup> , You Peng<sup>1,†</sup> , Ying Zhao<sup>1,†</sup> , Feiin Chan<sup>1</sup> , Qiqi Ren<sup>1</sup> ,Zhenjie Liu<sup>2\*</sup>

4        1: The Second Clinical College of Guangzhou University of Chinese Medicine, Guangzhou, China

5        2: The Second Affiliated Hospital of Guangzhou University of Chinese Medicine (Guangdong

6        Provincial Hospital of Traditional Chinese Medicine), Guangzhou, China

7

8

9

10

11

12

13

14

15

16

17

18

19        Corresponding author:

20        Zhenjie Liu: [gzlzjie@gzucm.edu.cn](mailto:gzlzjie@gzucm.edu.cn)

21        †These authors contributed equally to this work.

22

NOTE: This preprint reports new research that has not been certified by peer review and should not be used to guide clinical practice.

## 23 **Abstract**

24 **Background:** Predominantly attributed to metabolic disruptions, individuals with diabetes are  
25 more prone to kidney stones than the general population. The Body Rounds Index (BRI), a new  
26 measure of obesity and health risks, has been shown to have a positive correlation with the risk  
27 of developing kidney stones. Our study sets out to explore the correlation between BRI and  
28 kidney stones specifically within the diabetic population.

29 **Methods:** Leveraging data from the National Health and Nutrition Examination Survey  
30 (NHANES) spanning 2011 to 2018, this cross-sectional study probed the link between BRI and  
31 kidney stones among diabetic individuals. We conducted a logistic regression analysis to  
32 investigate the relationship between BRI and kidney stones, with adjustments for various  
33 covariates. To further explore the association trends between different BRI levels and the  
34 incidence of kidney stones, we categorized BRI into four levels, thereby enhancing the  
35 robustness of our results. Additionally, subgroup and sensitivity analyses were performed to  
36 ensure the reliability and consistency of our findings.

37 **Results:** A total of 3,558 diabetic patients were included in this study, of whom 546 (15.3%)  
38 had kidney stones. After adjusting for some and all confounders, we observed that the  
39 prevalence of kidney stones in diabetic patients increased by 7% and 5% for each unit increase  
40 in BRI in Models 2 and 3, respectively (Model 2: OR=1.07, 95% CI: 1.03-1.11; Model 3:  
41 OR=1.05, 95% CI: 1.00-1.09). This association remained statistically significant when the BRI  
42 was divided into quartiles, the prevalence of kidney stones in the highest quartile of BRI (Q4)  
43 was 50% greater than in the lowest quartile (Q1) (OR=1.50, 95% CI: 1.14-1.98; P<0.05).

44 **Conclusions:** Our research indicates a positive correlation between BRI and the incidence of

45 kidney stones among diabetics. We believe that BRI may be an effective indicator for assessing

46 the risk of kidney stones in diabetic patients.

47 **Keywords:** Diabetes; BRI; Kidney Stones; Obesity;NHANES

48

## 49 **1. Introduction**

50 Kidney stones, a common urological disorder, are solid crystalline deposits that form due  
51 to the abnormal accumulation of minerals and acid salts in the kidneys(1). The incidence of  
52 kidney stones worldwide stands at around 10% and is persistently climbing(1,2).  
53 Extracorporeal shock wave lithotripsy and other minimally invasive procedures are effective  
54 methods for stone extraction; however, the recurrence rate of kidney stones can be as high as  
55 50%(3). Kidney stones can lead to serious complications, including urinary tract infections,  
56 kidney damage, and even renal failure(4), which present significant challenges to public health  
57 systems. Thus, identifying risk factors for kidney stones and implementing effective preventive  
58 measures is crucial(2,5).

59 Studies have shown that the incidence of kidney stones in the diabetic population is  
60 significantly higher than that in the general population(6), which aroused our concern, which  
61 may be attributed to many factors such as disorders of glucose-fat metabolism and obesity, and  
62 Chou YH et al. also proved that there is a positive correlation between the incidence of body  
63 weight gain and KSD(7), and as the mainstream indicator for assessing obesity——Body Mass  
64 Index(BMI), current research has confirmed that BMI does not accurately reflect the  
65 distribution of body fat (8).Consequently, Thomas et al. proposed the Body Roundness Index  
66 (BRI) as an emerging measure for evaluating obesity and associated health risks. BRI is  
67 calculated by combining height and waist circumference, allowing for a more effective  
68 assessment of visceral fat tissue and overall body fat percentage(9). Research by Xudong Hu et  
69 al. (10)found a linear positive correlation between BRI and the risk of developing kidney stones,  
70 with BRI showing a significantly greater ability to differentiate kidney stone risk than BMI and

71 waist circumference. Xike Mao et al. (11) established that for each unit increase in BRI, the  
72 prevalence of kidney stones increased by 65% (OR = 1.65, 95% CI: 1.47, 1.85) after adjusting  
73 for confounding factors. However, most of these studies have focused on the general population,  
74 and research examining the relationship between BRI and the prevalence of kidney stones in  
75 specific populations, such as diabetic patients, remains relatively limited. Research by Liting  
76 Qiu et al. (12) showed that patients with diabetes and prediabetes had higher BRI values (Mean  
77  $\pm$  SD = 5.89  $\pm$  2.21) than the non-diabetic population (Mean  $\pm$  SD = 4.63  $\pm$  1.85), and  
78 the elevated BRI values further affected their risk of renal stones. Therefore, by identifying and  
79 intervening on BRI, it can help to more accurately assess the risk of kidney stones in diabetic  
80 patients and may lead to more effective personalized prevention and treatment strategies. By  
81 monitoring and improving BRI, the goal of reducing the prevalence of kidney stones can be  
82 achieved, especially in the high-risk population of diabetes.

83 Although current studies have demonstrated an association between BRI and kidney  
84 stones, these studies have focused on the general population, and there is a lack of in-depth  
85 research on the relationship between BRI and kidney stones in diabetic patients. Because the  
86 association between BRI and kidney stones in the diabetic population is unknown, we sought  
87 to reveal the specific role of BRI in the development of diabetes-associated kidney stones and  
88 to provide new strategies and perspectives for the prevention and treatment of kidney stones  
89 through a cross-sectional study of diabetic patients based on the NHANES survey conducted  
90 in the United States between 2011 and 2018.

91

## 92 **2. Methods**

## 93 2.1 Study participants

94 The data for this research are based on the NHANES survey conducted between 2011 and  
95 2018. NHANES is a national cross-sectional study conducted in the United States that employs  
96 a stratified multistage random sampling methodology to collect data from the ambulatory  
97 population. The detailed design, methodology, and data of the survey are available on its official  
98 website (<http://www.example.com>) and the U.S. Centers for Disease Control and Prevention's  
99 (CDC) National Health and Nutrition Examination Survey (NHANES) page  
100 (<http://www.cdc.gov/nchs/nhanes.htm>). All participants provided written consent to participate  
101 in the NHANES study, which was approved by the ethics committee(13). Consequently, no  
102 additional approvals or ethical reviews were required for this study. Of the initial 4,432 diabetic  
103 patients collected, we excluded 74 individuals younger than 20 years of age, 496 individuals  
104 with incomplete BRI data, 13 individuals with incomplete information regarding renal stones  
105 (including diagnosis), and 291 individuals with missing covariate data. This resulted in a final  
106 sample size of 3,558 individuals included in the study (Figure 1).

107

108 Figure 1. Flow chart of participant selection.

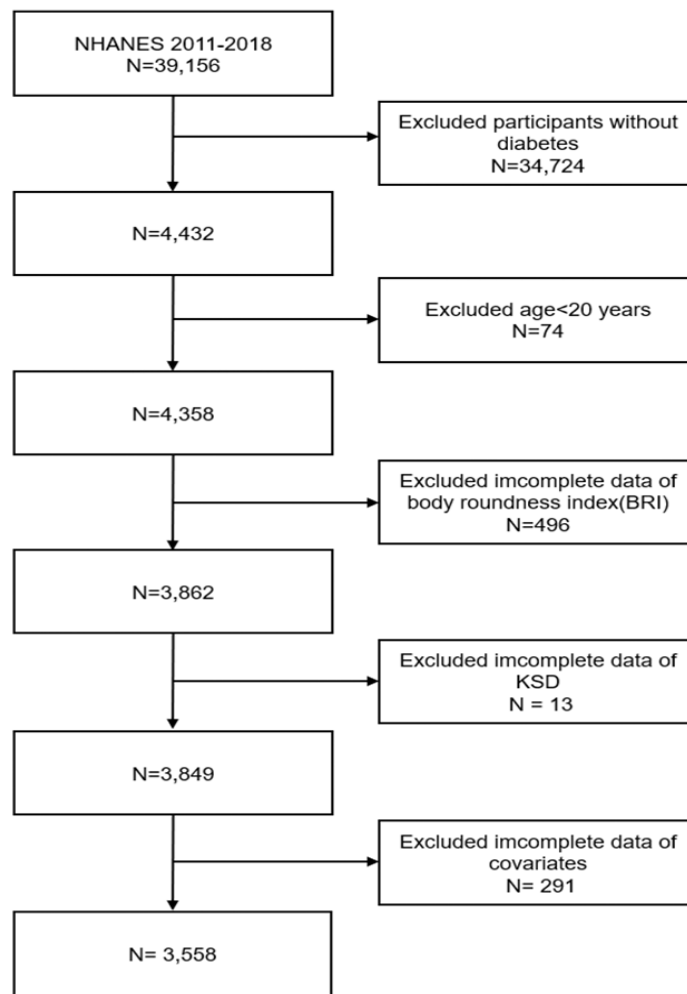

109

## 110 2.2 Assessment of body roundness index

111 In 2013, Thomas and colleagues initially introduced the concept of BRI(9).BRI uses height  
 112 and waist circumference (WC) to assess the percentage of visceral and total body fat. We  
 113 obtained participants' waist circumference (WC) and height data from the body measurements  
 114 section of the NHANES database. The following formula was then applied to calculate the BRI  
 115 values:

$$116 \quad \text{BRI} = 364.2 - 365.5 \times \sqrt{1 - \left( \frac{\frac{WC(m)}{2\pi}}{0.5 \times BH(m)} \right)^2}$$

## 117 2.3 Diabetes and kidney stones

118 Diabetes is diagnosed in an individual who fulfills one or more of the subsequent criteria:

119 (1) A fasting blood glucose value of at least 7.0 mmol/L or a 2-hour oral glucose tolerance test  
120 result of  $\geq 11.1$  mmol/L; (2) a blood glucose concentration of  $\geq 11.1$  mmol/L at any given time;  
121 (3) a glycosylated hemoglobin (HbA1c) level of  $\geq 6.5\%$ ; (4) ongoing use of glucose-lowering  
122 medications or insulin injections; and (5) a self-reported diabetes diagnosis by a physician(14).  
123 The urology section of NHANES includes a questionnaire called the KIQ26, which collects  
124 information about participants' history of kidney stones. Participants' history was assessed by  
125 asking, "Have you ever had a kidney stone?" Participants who responded affirmatively were  
126 identified as having a history of kidney stones, while those who answered negatively were  
127 categorized as having no such history.

## 128 **2.4 Covariates**

129 Kidney stones are influenced by many factors, we included the following covariates: age,  
130 gender, education level (less than 9th grade, 9th-11th grade, high school graduate/GED or  
131 equivalent, some college or AA degree, college graduate or above), marital status  
132 (married/living with partner, widowed/divorced/separated, never married), smoking status  
133 (defined as having smoked at least 100 cigarettes), activity status (vigorous work activity,  
134 moderate work activity, vigorous recreational activities, moderate recreational activities,  
135 physical activity—walking or bicycling, minutes of sedentary activity), height, weight, and  
136 body mass index (BMI), calculated as weight (kg) divided by height (m) squared. Total  
137 cholesterol (TC), high-density lipoprotein cholesterol (HDL-C), urine creatinine (UCr), uric  
138 acid (UA), serum creatinine (Scr), urea albumin creatinine ratio (UACR), blood urea nitrogen  
139 (BUN), and hypertension. Hypertension is characterized by a self-reported history of  
140 hypertension, the utilization of antihypertensive medications, or by achieving a mean systolic



141 blood pressure of 140 mmHg or greater and/or a mean diastolic blood pressure of 90 mmHg or  
142 greater.

## 143 **2.5 Statistical analysis**

144 Continuous variables were reported as mean  $\pm$  standard deviation (SD), while categorical  
145 variables are expressed as frequency (%). One-way analysis of variance (ANOVA) was utilized  
146 for the analysis of continuous variables, while the chi-square test was applied to categorical  
147 variables. We performed univariate and multivariate analyses to investigate the relationship  
148 between BRI and kidney stones. When considering BRI as a continuous variable, we utilized a  
149 linear regression model for the computation of the odds ratio (OR); correspondingly, logistic  
150 regression models were applied for categorical variables. Model 1 was not adjusted. Model 2  
151 only adjusted for Age and Gender. Model 3 adjusted for Age, Gender, BMI, Weight, Education  
152 level, Smoking status, Marital status, HDL-C, Vigorous work activity, Moderate work activity,  
153 Physical Activity-Walk or bicycle, Vigorous recreational activities, Moderate recreational  
154 activities, Minutes sedentary activity, UCr, Scr, UA, UACR, BUN, TC, and Hypertension. To  
155 achieve statistical significance, a P value of  $< 0.05$  was required. All estimates were calculated  
156 considering the NHANES weights. Weighting was applied to all analyses in accordance with  
157 the NHANES analysis guidelines. In this study, all statistical analyses were performed using R  
158 version 4.2.3 (R Foundation for Statistical Computing, Vienna, Austria) and SPSS version 23.0  
159 (SPSS Inc., Chicago, IL, USA).

160

## 161 **3. Results**

### 162 **3.1 Characteristics of the study population**

163 Table 1 shows the results of comparing levels of the BRI and key demographic variables  
 164 between diabetic patients with and without kidney stones. Among all participants (n = 3558),  
 165 the mean BRI in the group with kidney stones was 7.18, which was higher than that in the group  
 166 without kidney stones (7.18 vs. 6.95,  $p < 0.05$ ). Whether diabetic patients have kidney stones  
 167 or not is associated with various factors, including age, gender, weight, BMI, BRI, HDL-C, TC,  
 168 UCr, Scr, UACR, BUN, marital status, engagement in strenuous work activities, cycling or  
 169 bicycle use, and smoking status ( $p < 0.05$ ). Diabetic patients with kidney stones were generally  
 170 older and heavier and had higher BMI, lower HDL-C and TC levels, and elevated UCr, Scr,  
 171 UACR, and BUN compared to those without kidney stones ( $p < 0.05$ ). Furthermore, diabetic  
 172 patients with kidney stones were more likely to be male, possess an education level of at least  
 173 some college or an associate degree, and be married or cohabiting.

174

175 Tabel 1 Baseline characteristics of the study participants.

| Characteristics                   | Non-Kidney stones (n=3012) | Kidney stones (n=546) | p-value  |
|-----------------------------------|----------------------------|-----------------------|----------|
| Age (years)                       | 60.11±13.49                | 62.04±12.68           | 0.004**  |
| Gender                            |                            |                       | <0.001** |
| Male                              | 1527 (50.70%)              | 328 (60.07%)          |          |
| Female                            | 1485 (49.30%)              | 218 (39.93%)          |          |
| Education level                   |                            |                       | 0.383    |
| Less than 9th grade               | 465 (15.44%)               | 81 (14.84%)           |          |
| 9-11th grade (Includes 12th grade | 444 (14.74%)               | 78 (14.29%)           |          |

---

|                                        |               |              |         |
|----------------------------------------|---------------|--------------|---------|
| with no diploma)                       |               |              |         |
| High school graduate/GED or equivalent | 693 (23.01%)  | 122 (22.34%) |         |
| Some college or AA degree              | 850 (28.22%)  | 176 (32.23%) |         |
| College graduate or above              | 560 (18.59%)  | 89 (16.30%)  |         |
| Marital status                         |               |              | 0.007** |
| Married/Living with partner            | 1817 (60.33%) | 364 (66.67%) |         |
| Widowed/Divorced/Separated             | 874 (29.02%)  | 143 (26.19%) |         |
| Never married                          | 321 (10.66%)  | 39 (7.14%)   |         |
| Smoked at least 100 cigarettes in life |               |              | 0.021*  |
| NO                                     | 1590 (52.79%) | 259 (47.44%) |         |
| YES                                    | 1422 (47.21%) | 287 (52.56%) |         |
| Vigorous work activity                 |               |              | 0.038*  |
| NO                                     | 2565 (85.16%) | 446 (81.68%) |         |
| YES                                    | 447 (14.84%)  | 100 (18.32%) |         |
| Moderate work activity                 |               |              | 0.416   |
| NO                                     | 2072 (68.79%) | 366 (67.03%) |         |
| YES                                    | 940 (31.21%)  | 180 (32.97%) |         |
| Vigorous recreational activities       |               |              | 0.273   |
| NO                                     | 2695 (89.48%) | 497 (91.03%) |         |
| YES                                    | 317 (10.52%)  | 49 (8.97%)   |         |
| Moderate recreational activities       |               |              | 0.921   |

---

|                                   |                 |                 |          |
|-----------------------------------|-----------------|-----------------|----------|
| NO                                | 1976 (65.60%)   | 357 (65.38%)    |          |
| YES                               | 1036 (34.40%)   | 189 (34.62%)    |          |
| Physical Activity-Walk or bicycle |                 |                 | <0.001** |
| NO                                | 2352 (78.09%)   | 464 (84.98%)    |          |
| YES                               | 660 (21.91%)    | 82 (15.02%)     |          |
| Minutes sedentary activity (mins) | 370.78 +206.66  | 382.53 ± 212.42 | 0.272    |
| BMI (kg/m <sup>2</sup> )          | 32.13±7.37      | 32.71±7.16      | 0.034*   |
| Weight(kg)                        | 88.60±23.36     | 91.25±22.10     | <0.001** |
| TC (mmol/L)                       | 4.80 ± 1.22     | 4.61 ± 1.09     | 0.001**  |
| HDL-C (mmol/L)                    | 1.26 ± 0.38     | 1.19 ± 0.33     | <0.001** |
| UCr (mg/dL)                       | 116.20 +74.04   | 124.78±70.84    | <0.001** |
| UA (mg/dL)                        | 5.72 ± 1.54     | 5.75 ± 1.60     | 0.685    |
| Scr (mg/dL)                       | 0.96 ± 0.50     | 1.03 ± 0.70     | 0.009**  |
| UACR (mg/g)                       | 127.19 + 564.12 | 156.89 ±758.04  | 0.049*   |
| BUN (mg/dL)                       | 15.94 ± 7.63    | 17.34 ± 9.32    | <0.001** |
| High Blood Pressure               |                 |                 | 0.477    |
| NO                                | 1096 (36.39%)   | 190 (34.80%)    |          |
| YES                               | 1916 (63.61%)   | 356 (65.20%)    |          |
| BRI                               | 6.95±2.49       | 7.18±2.46       | 0.027*   |

176 Mean  $\pm$  SD for continuous variables: the p-value was calculated by the weighted linear  
177 regression model. % for categorical variables: the p-value was calculated by a weighted chi-  
178 square test. BMI: body mass index; HDL-C: high-density lipoprotein cholesterol ; TC: Total  
179 cholesterol ; UCr: urine creatinine; UA: uric acid; Scr: serum creatinine; UACR: urea albumin  
180 creatinine ratio; BUN: blood urea nitrogen.

181 \*\*P<0.01, \*P<0.05

182

### 183 **3.2 Association between BRI and Kidney stones**

184 Table 2 presents the results of the three logistic regression models. The results showed that  
185 for each unit increase in BRI among diabetic patients, the risk of kidney stones grew by  
186 4%(OR=1.04, 95% CI: 1.00-1.07), 7% (OR=1.07, 95% CI: 1.03-1.11, P<0.001), and 5%  
187 (OR=1.05, 95% CI: 1.00-1.09; P<0.05), respectively. When BRI was divided into quartiles, this  
188 association remained robust. In Model 2, the prevalence in Q4 was significantly higher than in  
189 Q1 by 50% (OR=1.50, 95% CI: 1.14-1.98; P<0.05). At the same time, compared to Q1, the  
190 incidence of kidney stones in the three model groups in Q3 increased by 41%(OR=1.41, 95%  
191 CI: 1.08-1.83; P<0.05), 52%(OR=1.52, 95% CI: 1.16-1.99; P<0.05), and 37%(OR=1.37, 95%  
192 CI: 1.03-1.81; P<0.05), respectively.

193

194 Table 2 The association between BRI and Kidney stones .

| Variables        | OR(95%CI),P-value  |                    |                   |
|------------------|--------------------|--------------------|-------------------|
|                  | Model 1            | Model 2            | Model 3           |
| BRI (continuous) | 1.04 (1.00,1.07) * | 1.07(1.03,1.11)*** | 1.05 (1.00,1.09)* |

#### Quartile of BRI

| Quartile of BRI | Reference         | Reference         | Reference         |
|-----------------|-------------------|-------------------|-------------------|
| Q1 (1.49-5.20)  | Reference         | Reference         | Reference         |
| Q2 (5.20-6.59)  | 1.32 (1.01,1.72)* | 1.32 (1.01,1.73)* | 1.28 (0.98,1.69)  |
| Q3 (6.59-8.30)  | 1.41 (1.08,1.83)* | 1.52 (1.16,1.99)* | 1.37 (1.03,1.81)* |
| Q4 (8.30-19.10) | 1.27 (0.97,1.66)  | 1.50 (1.14,1.98)* | 1.34 (0.99,1.81)  |
| P for trend     | 0.1284            | 0.0048            | 0.0858            |

BRI: Body roundness index; OR: Odds Ratio; CI: Confidence Interval; Model 1:Not adjusted; Model 2: Adjusted for age and gender; Model 3: Adjusted for Age, Gender, BMI, Weight, Education level, Marital status, Smoking status, HDL-C, Vigorous work activity, Moderate work activity, Physical Activity-Walk or bicycle, Vigorous recreational activities, Moderate recreational activities, Minutes sedentary activity, UCr, SCr, UA, UACR, BUN, TC, and Hypertension.

\*\*\*P<0.001, \*P<0.05

195

### 196 **3.3 Subgroup analysis**

197 To further elucidate the stability of the results, subgroup analyses were performed.  
 198 Interaction tests showed that the p for interaction > 0.05 in the following variables: weight, BMI,  
 199 Gender, age, HDL-C, Vigorous work activity, Moderate work activity, Physical Activity-Walk  
 200 or bicycle, Vigorous recreational activities, Moderate recreational activities, Minutes sedentary  
 201 activity, Smoked at least 100 cigarettes in life, TC, UCr, UA, Scr, UACR, BUN, Hypertension,  
 202 education level and Marital status. This showed that these variables did not influence the  
 203 relationship between BRI and kidney stones in diabetic patients, thus confirming the stability  
 204 of the relationship between BRI and the prevalence of kidney stones in diabetic patients (Table

205 3).

206

207 Tabel 3 Subgroup analysis of the association between BRI and Kidney stones

| Subgroup                                           | OR(95%CI)         | P      | P for interaction |
|----------------------------------------------------|-------------------|--------|-------------------|
| Age (years)                                        |                   |        | 0.1075            |
| 20-51                                              | 0.97 (0.84, 1.12) | 0.7142 |                   |
| 52-61                                              | 1.08 (0.94, 1.23) | 0.2818 |                   |
| 62- 69                                             | 0.98 (0.83, 1.15) | 0.8147 |                   |
| 70-80                                              | 1.24 (1.06, 1.45) | 0.0079 |                   |
| Gender                                             |                   |        | 0.1228            |
| Male                                               | 1.14 (1.02, 1.28) | 0.0180 |                   |
| Female                                             | 1.02 (0.92, 1.12) | 0.7087 |                   |
| Education level                                    |                   |        | 0.4694            |
| Less than 9th grade                                | 1.11 (0.87, 1.42) | 0.4182 |                   |
| 9-11th grade (Includes 12th grade with no diploma) | 1.00 (0.82, 1.22) | 0.9813 |                   |
| High school graduate/GED or equivalent             | 1.15 (0.99, 1.35) | 0.0707 |                   |
| Some college or AA degree                          | 1.09 (0.97, 1.23) | 0.1317 |                   |
| College graduate or above                          | 0.91 (0.72, 1.14) | 0.4179 |                   |

---

|                                           |                   |        |        |
|-------------------------------------------|-------------------|--------|--------|
| Marital status                            |                   |        | 0.6222 |
| Married/Living with partner               | 1.07 (0.97, 1.17) | 0.1764 |        |
| Widowed/Divorced/Separated                | 1.11 (0.97, 1.28) | 0.1418 |        |
| Never married                             | 0.96 (0.74, 1.25) | 0.7661 |        |
| Smoked at least 100 cigarettes in<br>life |                   |        | 0.2551 |
| NO                                        | 1.02 (0.92, 1.12) | 0.7211 |        |
| YES                                       | 1.11 (1.00, 1.23) | 0.0612 |        |
| Vigorous work activity                    |                   |        | 0.8320 |
| NO                                        | 1.06 (0.97, 1.15) | 0.1899 |        |
| YES                                       | 1.04 (0.87, 1.23) | 0.6871 |        |
| Moderate work activity                    |                   |        | 0.9154 |
| NO                                        | 1.06 (0.97, 1.16) | 0.1907 |        |
| YES                                       | 1.05 (0.94, 1.18) | 0.3676 |        |
| Vigorous recreational activities          |                   |        | 0.6703 |
| NO                                        | 1.07 (0.99, 1.15) | 0.0942 |        |
| YES                                       | 1.01 (0.80, 1.28) | 0.9143 |        |
| Moderate recreational activities          |                   |        | 0.7486 |
| NO                                        | 1.05 (0.97, 1.15) | 0.2437 |        |
| YES                                       | 1.08 (0.95, 1.23) | 0.2542 |        |
| Physical Activity-Walk or bicycle         |                   |        | 0.0759 |
| NO                                        | 1.09 (1.01, 1.18) | 0.0302 |        |

---



---

|                                  |                   |        |        |
|----------------------------------|-------------------|--------|--------|
| YES                              | 0.87 (0.68, 1.11) | 0.2581 |        |
| Minutes sedentary activity(mins) |                   |        | 0.5035 |
| 0 - 225                          | 1.10 (0.93, 1.29) | 0.2511 |        |
| 240-300                          | 1.18 (0.99, 1.40) | 0.0673 |        |
| 360-420                          | 1.00 (0.84, 1.20) | 0.9622 |        |
| 480-1380                         | 1.02 (0.91, 1.14) | 0.7021 |        |
| Weight(kg)                       |                   |        | 0.5903 |
| 37.4- 72.7                       | 1.21 (0.96, 1.52) | 0.1106 |        |
| 72.8-85.5                        | 1.06 (0.83, 1.35) | 0.6577 |        |
| 85.6-101.3                       | 1.13 (0.94, 1.35) | 0.1973 |        |
| 101.4- 195.4                     | 1.03 (0.93, 1.14) | 0.5696 |        |
| BMI (kg/m <sup>2</sup> )         |                   |        | 0.1534 |
| 16- 27                           | 1.17 (0.91, 1.52) | 0.2188 |        |
| 27.1- 31                         | 1.35 (1.06, 1.73) | 0.0152 |        |
| 31.1-35.9                        | 1.00 (0.82, 1.23) | 0.9911 |        |
| 36-67.7                          | 1.02 (0.93, 1.13) | 0.6717 |        |
| HDL-C(mmol/L)                    |                   |        | 0.6554 |
| 0.16- 0.98                       | 1.09 (0.95, 1.26) | 0.2179 |        |
| 1.01- 1.16                       | 1.10 (0.95, 1.27) | 0.1828 |        |
| 1.19- 1.42                       | 1.07 (0.93, 1.22) | 0.3507 |        |
| 1.45 - 5.84                      | 0.96 (0.81, 1.15) | 0.6893 |        |
| TC(mmol/L)                       |                   |        | 0.9145 |

---

---

|              |                   |        |        |
|--------------|-------------------|--------|--------|
| 1.97 - 3.88  | 1.07 (0.93, 1.24) | 0.3469 |        |
| 3.9 - 4.6    | 1.08 (0.94, 1.24) | 0.2985 |        |
| 4.63 - 5.46  | 1.06 (0.91, 1.23) | 0.4292 |        |
| 5.48 - 15.83 | 1.00 (0.84, 1.19) | 0.9932 |        |
| UCr (mg/dL)  |                   |        | 0.6768 |
| 3.54 - 63    | 0.99 (0.84, 1.18) | 0.9333 |        |
| 64-101       | 1.09 (0.94, 1.27) | 0.2691 |        |
| 102-154      | 1.12 (0.98, 1.28) | 0.0965 |        |
| 155 -576     | 1.03 (0.90, 1.18) | 0.6321 |        |
| UA(mg/dL)    |                   |        | 0.1680 |
| 0.8- 4.6     | 0.91 (0.77, 1.08) | 0.2915 |        |
| 4.7-5.5      | 1.13 (0.96, 1.32) | 0.1436 |        |
| 5.6- 6.6     | 1.05 (0.90, 1.22) | 0.5574 |        |
| 6.7- 18      | 1.15 (1.01, 1.32) | 0.0370 |        |
| Scr(mg/dL)   |                   |        | 0.4320 |
| 0.32-0.71    | 0.97 (0.82, 1.14) | 0.7017 |        |
| 0.72 - 0.86  | 1.00 (0.87, 1.16) | 0.9608 |        |
| 0.87 - 1.07  | 1.11 (0.94, 1.30) | 0.2043 |        |
| 1.08- 10.71  | 1.13 (0.97, 1.31) | 0.1069 |        |
| UACR(mg/g)   |                   |        | 0.0507 |
| 0.54- 6.77   | 1.03 (0.89, 1.20) | 0.6903 |        |
| 6.79 - 12.32 | 1.18 (1.03, 1.36) | 0.0202 |        |

---

---

|                     |                   |        |
|---------------------|-------------------|--------|
| 12.35 - 36.49       | 0.90 (0.77, 1.05) | 0.1650 |
| 36.53-11055.12      | 1.12 (0.96, 1.31) | 0.1422 |
| BUN(mg/dL)          |                   | 0.7196 |
| 3-10                | 0.97 (0.80, 1.17) | 0.7252 |
| 11 - 14             | 1.06 (0.93, 1.22) | 0.3738 |
| 15-18               | 1.07 (0.91, 1.26) | 0.4414 |
| 19 - 96             | 1.11 (0.97, 1.26) | 0.1366 |
| High Blood Pressure |                   | 0.1476 |
| NO                  | 0.98 (0.86, 1.12) | 0.7956 |
| YES                 | 1.10 (1.01, 1.20) | 0.0302 |

---

208 Adjusted for Age, Gender, BMI, Weight, Education level, Marital status, Smoking status, HDL-C,  
 209 Vigorous work activity, Moderate work activity, Physical Activity-Walk or bicycle, Vigorous recreational  
 210 activities, Moderate recreational activities, Minutes sedentary activity, UCr, Scr, UA, UACR, BUN, TC,  
 211 and Hypertension.

## 212 **4. Discussion**

213 This study represents the pioneering attempt to explore the link between BRI and the  
 214 occurrence of kidney stones in diabetic patients. We found that the BRI of diabetic individuals  
 215 with kidney stones was higher than that of those without kidney stones, and the data revealed a  
 216 strong and a significantly positive association between BRI and kidney stone prevalence. This  
 217 relationship remained robust in subgroup analyses.

218 Currently, there are no articles specifically investigating the correlation between BRI and  
 219 the prevalence of kidney stones in diabetic populations, but a study by Xudong Hu et al.

220 (10)indicated that the average BRI level in kidney stone patients (Mean  $\pm$  SD = 6.11  $\pm$  0.06)  
221 was substantially higher than that in non-kidney stone individuals (Mean  $\pm$  SD = 5.36  $\pm$  0.03).  
222 Gaoteng Lin et al.(15)also reached the same conclusion, noting that an increase in BRI values  
223 leads to a higher risk of developing kidney stones in men aged 20-39 years (OR = 1.34, 95%  
224 CI 1.06-1.69) and 40-59 years (OR = 1.29, 95% CI 1.09-1.53). Similarly, in women aged 40-  
225 59 years, the prevalence of kidney stones increased with rising BRI values (OR = 1.23, 95% CI  
226 1.07-1.41). Compared to BMI, BRI is more accurate in identifying the risk of kidney stones(10).

227 Research by Rahman IA et al. (16) indicates that there is a certain association between  
228 diabetes and an increased likelihood of developing kidney stones, making it particularly  
229 important to identify and manage high-risk populations with diabetes and kidney stones early  
230 in clinical practice. Our study shows that in diabetic patients, higher BRI levels correlate with  
231 a heightened risk of developing kidney stones ( $P < 0.05$ ), suggesting that BRI in diabetic  
232 patients may serve as a predictive indicator for assessing the risk of kidney stones in this  
233 population. However, the mechanisms underlying the relationship between elevated BRI and  
234 the occurrence of kidney stones in diabetic patients remain unclear. We speculate that this may  
235 be due to the metabolic disorders often associated with diabetes, including hyperglycemia,  
236 dyslipidemia, and insulin resistance, which could all affect kidney function and consequently  
237 increase the risk of kidney stones. More importantly, studies have shown that obesity, a risk  
238 factor for kidney stones, increases the likelihood of developing these stones(17,18). The  
239 prevalence of obesity is often higher among individuals with diabetes, primarily due to insulin  
240 resistance. In response to insulin resistance, the pancreas increases insulin secretion, leading to  
241 hyperinsulinemia. This surge in insulin levels can stimulate fat deposition, especially in the

242 abdominal area, thereby exacerbating obesity and increasing the incidence of kidney stones.  
243 Therefore, we believe that obesity is one of the manifestations of glucose and lipid metabolism  
244 disorders in diabetic patients and is also a risk factor for the occurrence of kidney stones. If an  
245 indicator could be identified to assess the obesity levels in diabetic patients, it would aid in  
246 better understanding and preventing the occurrence of kidney stones in diabetes, thereby  
247 offering new strategies to reduce the risk of kidney stones in this vulnerable population.

248       Currently, the indicators for assessing visceral fat in the body are primarily BMI and WC,  
249 but they provide limited information on fat distribution(19,20). In contrast, BRI can  
250 comprehensively assess the percentage of visceral fat and total body fat, thus providing a more  
251 comprehensive picture of fat distribution in diabetic patients. Therefore, using BRI instead of  
252 BMI and WC may provide more accurate information for assessing fat distribution in diabetic  
253 patients. Previous studies have shown that BRI levels in diabetic and prediabetic populations  
254 are higher than those in non-diabetic populations(21,22). This may be due to the fact that in  
255 diabetic patients, hyperglycemia and insulin resistance trigger increased fat synthesis in the  
256 liver and accelerated fatty acid metabolism in adipose tissue, which ultimately leads to  
257 abnormal lipid levels(23,24). We propose that if lifestyle interventions and pharmacological  
258 treatments fail to control lipid metabolism disorders in diabetic patients effectively, it might  
259 instigate stress on the endoplasmic reticulum along with oxidative stress reactions. These  
260 responses could lead to decreased gene expression and secretion, as well as increased apoptosis  
261 of pancreatic  $\beta$ -cells, ultimately impairing  $\beta$ -cell function. As a result, impaired  $\beta$ -cell function  
262 reduces insulin sensitivity and secretion, contributing to persistent hyperglycemia and  
263 accelerating the development of kidney stones(25).

264 Lipocalin, as a protective adipokine, is influenced by visceral fat levels. When visceral fat  
265 levels increase, adiponectin concentrations decrease, while levels of pro-inflammatory  
266 cytokines (such as tumor necrosis factor and interleukin-6) rise, further exacerbating insulin  
267 resistance(26). Similarly, a meta-analysis by Geraghty R et al. that included cohort studies,  
268 cross-sectional studies, and case-control studies indicated that the incidence of kidney stones is  
269 significantly increased in patients with diabetes. This occurs as insulin resistance diminishes  
270 both the production and the transport of renal ammonium in the proximal renal tubules while  
271 increasing the reabsorption of urinary bicarbonate and sodium, leading to excessive urine  
272 acidification and a decrease in urine pH(27). The increase in fatty acids further lowers urine pH.  
273 The highly acidic urine produced by obese patients reduces the saturation of uric acid and  
274 calcium oxalate complexes in the urine, resulting in the creation of uric acid stones. Additionally,  
275 insulin resistance decreases urinary citrate concentration, which not only decreases urine pH  
276 and encourages the development of uric acid stones but also aids in the formation of calcium  
277 oxalate stones. Once uric acid crystals form, urinary oxalate and calcium ions can also promote  
278 the creation of calcium oxalate stones via a process of heterogeneous nucleation(28,29). In  
279 terms of lipids, our findings suggested that diabetic patients with kidney stones had lower HDL-  
280 C levels (Mean±SD=1.19±0.33) than those without kidney stones (Mean±SD=1.26±0.38)  
281 (p<0.001). Besiroglu et al. analyzed 11 studies on the correlation between urinary stones and  
282 dyslipidemia and found that lower HDL-C levels significantly increased the risk of urinary  
283 stones(30). Data from a study involving 38,617 U.S. adults indicated that HDL-C levels were  
284 significantly lower in individuals with kidney stones compared to those without, and that lower  
285 HDL-C levels were a risk factor for kidney stone formation among U.S. adults, while TC,

286 triglycerides (TG), and LDL-C showed no association with stone formation(31). These findings  
287 are consistent with our research. This could be due to dyslipidemia's contribution to chronic  
288 inflammation and oxidative stress, factors that are instrumental in the development of urinary  
289 stones. Previous studies have shown that inflammation resulting from metabolic changes  
290 promotes crystal formation in the kidneys of obese mice with metabolic syndrome(32). Patients  
291 with diabetes exhibit an increased prevalence of kidney stones relative to the general population,  
292 likely due to insulin resistance and dyslipidemia. Currently, there are no established predictors  
293 of kidney stone risk specifically for the diabetic population. If an indicator can be used to predict  
294 the risk of kidney stones in diabetes mellitus. In that case, appropriate clinical strategies can be  
295 developed to effectively intervene in patients and decrease the occurrence of kidney stones in  
296 the diabetic individuals. Our research demonstrated that the prevalence of kidney stones among  
297 people with diabetes increased in parallel with rising BRI levels, suggesting that BRI could  
298 serve as a valuable predictor of kidney stone risk in this population.

299 The advantages of this study are as follows: 1. This study is based on NHANES data from  
300 2011 to 2018, with a large sample size that enhances the representativeness and statistical power  
301 of the findings. 2. This study comprehensively considers data, including demographic  
302 characteristics, lifestyle habits, clinical measurements, and biochemical indicators, effectively  
303 controlling for various potential confounding factors. 3. As the first study to explore the  
304 association between BRI and kidney stones in the diabetic population, it reveals that metabolic  
305 disturbances in this population may exacerbate the risk of kidney stones, making the findings  
306 particularly significant for the prevention and treatment of kidney stones in individuals with  
307 diabetes. The limitations of this study are as follows: 1. Due to the cross-sectional nature of

308 NHANES data, causality cannot be established, and only the association between BRI and  
309 kidney stones can be observed. 2. Some information in the study, such as the diagnosis of  
310 diabetes and lifestyle factors, relies on self-reporting by participants, which may introduce  
311 recall bias. 3. Individuals with incomplete data were excluded from the analysis, which may  
312 affect the selectivity of the sample and the generalizability of the results. 4. Since NHANES  
313 data primarily comes from a non-institutionalized population in the United States, the findings  
314 may be limited by racial and regional characteristics, restricting their applicability on a global  
315 scale. Future research needs to validate these findings in different populations and consider  
316 more potential confounding factors to enhance the broader applicability of the results.

317

## 318 **5. Conclusion**

319 Utilizing NHANES data from 2011 to 2018, this study is the first to explore the  
320 relationship between BRI and kidney stones in a diabetic population, providing new insights.  
321 This study found that BRI was higher in diabetic patients with kidney stones compared to those  
322 without. Furthermore, a significant positive correlation was observed between BRI and the  
323 prevalence of kidney stones in the diabetic population, suggesting that BRI may serve as a valid  
324 indicator for assessing the risk of kidney stones in this group and highlighting the important  
325 role of visceral adiposity in kidney stone pathogenesis within the context of diabetes-related  
326 metabolic disorders.

327

## 328 **Author contributions**

329 **Conceptualization:** Chongsong Cui.



330 **Data curation:** Chongsong Cui, You Peng, Ying Zhao.

331 **Formal analysis:** Chongsong Cui.

332 **Investigation:** Feiin Chan, Qiqi Ren.

333 **Methodology:** Chongsong Cui.

334 **Project administration:** Chongsong Cui.

335 **Resources:** Feiin Chan.

336 **Supervision:** Zhenjie Liu.

337 **Validation:** Feiin Chan.

338 **Visualization:** Qiqi Ren.

339 **Writing– original draft:** Chongsong Cui, You Peng, Ying Zhao.

340 **Writing– review & editing:** Zhenjie Liu

## 341 **Funding**

342 This work was funded by the Science and Technology Research initiative of the Guangdong

343 Provincial Hospital of Traditional Chinese Medicine, under the project code YN2023MS07.

## 344 **Consent for publication**

345 Not applicable

## 346 **Conflict of interest**

347 The research was conducted without any commercial or financial associations that could be

348 perceived as a possible conflict of interest.

## 349 **Ethical statement**

350 The studies involving human participants were reviewed and approved by NCHS Ethics

351 Review Board. The patients/participants provided their written informed consent to participate

352 in this study.

### 353 **Acknowledgments**

354 We are grateful for the National Health and Nutritional Evaluation Survey being made  
355 accessible to the entire population by the National Center for Medical Research at the Institute  
356 of Prevention and Control of Disorders.

### 357 **Data availability**

358 The survey data are publicly available on the internet for data users and researchers throughout  
359 the world ( [www.cdc.gov/nchs/nhanes/](http://www.cdc.gov/nchs/nhanes/) ).

360

### 361 **Reference**

- 362 1. Sorokin I, Mamoulakis C, Miyazawa K, Rodgers A, Talati J, Lotan Y. Epidemiology of stone  
363 disease across the world. *World J Urol.* (2017) 35:1301–1320. doi: 10.1007/s00345-017-2008-  
364 6
- 365 2. Hill AJ, Basourakos SP, Lewicki P, Wu X, Arenas-Gallo C, Chuang D, et al. Incidence of  
366 kidney stones in the United States: the continuous national health and nutrition examination  
367 survey. *J Urol.* (2022) 207(4):851–856. doi: 10.1097/JU.0000000000002331
- 368 3. Yasui T, Okada A, Hamamoto S, Ando R, Taguchi K, Tozawa K, et al. Pathophysiology-based  
369 treatment of urolithiasis. *Int J Urol.* (2017) 24(1):32–38. doi: 10.1111/iju.13187
- 370 4. Sasmaz Mİ, Kirpat V. The relationship between the severity of pain and stone size,  
371 hydronephrosis and laboratory parameters in renal colic attack. *Am J Emerg Med.* (2019)  
372 37(11):2107–2110. doi: 10.1016/j.ajem.2019.06.013

- 373 5. Türk C, Petřík A, Sarica K, Seitz C, Skolarikos A, Straub M, et al. EAU guidelines on  
374 interventional treatment for urolithiasis. *Eur Urol.* (2016) 69(3):475–482.doi:  
375 10.1016/j.eururo.2015.07.041
- 376 6. Sorokin I, Mamoulakis C, Miyazawa K, Rodgers A, Talati J, Lotan Y. Epidemiology of stone  
377 disease across the world. *World J Urol.* (2017) 35:1301–1320. doi: 10.1007/s00345-017-2008-  
378 6
- 379 7. Chou YH, Su CM, Li CC, Liu CC, Liu ME, Wu WJ, et al. Difference in urinary stone  
380 components between obese and non-obese patients. *Urol Res.* (2011) 39:283–287. doi:  
381 10.1007/s00240-010-0344-8
- 382 8. Piqueras P, Ballester A, Durá-Gil JV, Martínez-Hervas S, Redón J, Real JT. Anthropometric  
383 indicators as a tool for diagnosis of obesity and other health risk factors: a literature review.  
384 *Front Psychol.* (2021) 12:631179. doi: 10.3389/fpsyg.2021.631179
- 385 9. Thomas DM, Bredlau C, Bosity-Westphal A, Mueller M, Shen W, Gallagher D, et al.  
386 Relationships between body roundness with body fat and visceral adipose tissue emerging  
387 from a new geometrical model. *Obesity.* (2013) 21(11):2264–2271. doi: 10.1002/oby.20408
- 388 10. Hu X, Li X, Ye N, Zhou Z, Li G, Jiang F. Association of novel anthropometric indices with  
389 prevalence of kidney stone disease: a population-based cross-sectional study. *Eur J Med Res.*  
390 (2024) 29(1):204. doi: 10.1186/s40001-024-01743-5
- 391 11. Mao X, Yang Y, Yang J, Chen M, Hao Z. Association between body roundness index and  
392 prevalence of kidney stone in the US: a study based on the NHANES database. *BMC Urol.*  
393 (2024) 24(1):93. doi: 10.1186/s12894-024-01433-8

- 394 12. Qiu L, Xiao Z, Fan B, Li L, Sun G. Association of body roundness index with diabetes and  
395 prediabetes in US adults from NHANES 2007–2018: a cross-sectional study. *Lipids Health*  
396 *Dis.* (2024) 23(1):252. doi: 10.1186/s12944-024-02238-2
- 397 13. National Center for Health Statistics. NCHS Research Ethics Review Board Approval (2022).  
398 <https://www.cdc.gov/nchs/nhanes/irba98.htm> [Accessed November 15, 2024].
- 399 14. Cheng YJ, Kanaya AM, Araneta MRG, Saydah SH, Kahn HS, Gregg EW, et al. Prevalence of  
400 diabetes by race and ethnicity in the United States, 2011-2016. *JAMA.* (2019) 322(24):2389–  
401 2398. doi: 10.1001/jama.2019.19365
- 402 15. Lin G, Zhan F, Ren W, Pan Y, Wei W. Association between novel anthropometric indices and  
403 prevalence of kidney stones in US adults. *World J Urol.* (2023) 41(11):3105–3111. doi:  
404 10.1007/s00345-023-04582-x
- 405 16. Rahman IA, Nusaly IF, Syahrir S, Nusaly H, Mansyur MA. Association between metabolic  
406 syndrome components and the risk of developing nephrolithiasis: a systematic review and  
407 bayesian meta-analysis. *F1000Res.* (2021) 10:104. doi: 10.12688/f1000research.28346.1
- 408 17. Kim S, Chang Y, Yun KE, Jung HS, Kim I, Hyun YY, et al. Metabolically healthy and  
409 unhealthy obesity phenotypes and risk of renal stone: a cohort study. *Int J Obes.* (2019)  
410 43(4):852–861. doi: 10.1038/s41366-018-0140-z
- 411 18. Yuan S, Larsson SC. Assessing causal associations of obesity and diabetes with kidney stones  
412 using Mendelian randomization analysis. *Mol Genet Metab.* (2021) 134(1-2):212–215. doi:  
413 10.1016/j.ymgme.2021.08.010

- 414 19. Müller MJ, Lagerpusch M, Enderle J, Schautz B, Heller M, Bosy-Westphal A. Beyond the  
415 body mass index: tracking body composition in the pathogenesis of obesity and the metabolic  
416 syndrome. *Obes Rev.* (2012) 13:6–13. doi: 10.1111/j.1467-789X.2012.01033.x
- 417 20. Busetto L, Baggio MB, Zurlo F, Carraro R, Digo M, Enzi G. Assessment of abdominal fat  
418 distribution in obese patients: anthropometry versus computerized tomography. *Int J Obes.*  
419 (1992) 16(10):731–731. doi: 10.1055/s-2007-1003373
- 420 21. Wan Z, Guo J, Pan A, Chen C, Liu L, Liu G. Association of serum 25-hydroxyvitamin D  
421 concentrations with all-cause and cause-specific mortality among individuals with diabetes.  
422 *Diabetes Care.* (2021) 44(2):350–357. doi: 10.2337/dc20-1485
- 423 22. Yang T, Zhao B, Pei D. Evaluation of the association between obesity markers and type 2  
424 diabetes: a cohort study based on a physical examination population. *J Diabetes Res.* (2021)  
425 2021(1):6503339. doi: 10.1155/2021/6503339
- 426 23. Chen SC, Tseng CH. Dyslipidemia, kidney disease, and cardiovascular disease in diabetic  
427 patients. *Rev Diabet Stud.* (2013) 10(2-3):88–100. doi: 10.1900/RDS.2013.10.88
- 428 24. Dronavalli S, Duka I, Bakris GL. The pathogenesis of diabetic nephropathy. *Nat Clin Pract*  
429 *Endocrinol Metab.* (2008) 4(8):444–452. doi: 10.1038/ncpendmet0894
- 430 25. Wagner R, Eckstein SS, Yamazaki H, Gerst F, Machann J, Jaghutriz BA, et al. Metabolic  
431 implications of pancreatic fat accumulation. *Nat Rev Endocrinol.* (2022) 18(1):43–54. doi:  
432 10.1038/s41574-021-00573-3

- 433 26. Ouchi N, Parker JL, Lugus JJ, Walsh K. Adipokines in inflammation and metabolic disease.  
434 *Nat Rev Immunol.* (2011) 11(2):85–97. doi: 10.1038/nri2921
- 435 27. Geraghty R, Abdi A, Somani B, Cook P, Roderick P. Does chronic hyperglycaemia increase  
436 the risk of kidney stone disease? results from a systematic review and meta-analysis. *BMJ*  
437 *Open.* (2020) 10(1):e032094. doi: 10.1136/bmjopen-2019-032094
- 438 28. Strohmaier WL, Wrobel BM, Schubert G. Overweight, insulin resistance and blood pressure  
439 (parameters of the metabolic syndrome) in uric acid urolithiasis. *Urol Res.* (2012) 40:171–175.  
440 doi: 10.1007/s00240-011-0403-9
- 441 29. Bell D. Beware the low urine pH—the major cause of the increased prevalence of  
442 nephrolithiasis in the patient with type 2 diabetes. *Diabetes Obes Metab.* (2012) 14(4):299–  
443 303. doi: 10.1111/j.1463-1326.2011.01519.x
- 444 30. Besiroglu H, Ozbek E. Association between blood lipid profile and urolithiasis: a systematic  
445 review and meta-analysis of observational studies. *Int J Urol.* (2019) 26(1):7–17. doi:  
446 10.1111/iju.13781
- 447 31. Gao M, Liu M, Zhu Z, Chen H. The association of dyslipidemia with kidney stone: result from  
448 the NHANES 2007–2020. *Int Urol Nephrol.* (2024) 56(1):35–44. doi: 10.1007/s11255-023-  
449 03784-x
- 450 32. Taguchi K, Okada A, Hamamoto S, Iwatsuki S, Naiki T, Ando R, et al. Proinflammatory and  
451 metabolic changes facilitate renal crystal deposition in an obese mouse model of metabolic  
452 syndrome. *J Urol.* (2015) 194(6):1787–1796. doi: 10.1016/j.juro.2015.07.083

Figure 1. Flow chart of participant selection.

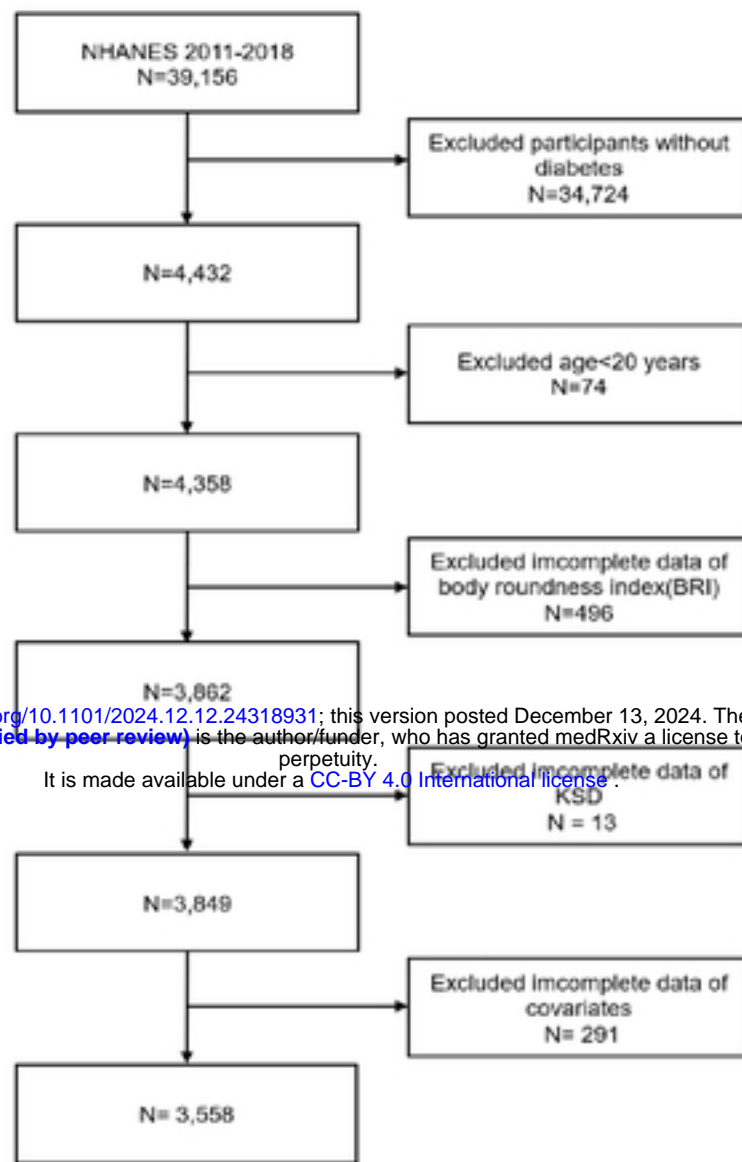

medRxiv preprint doi: <https://doi.org/10.1101/2024.12.12.24318931>; this version posted December 13, 2024. The copyright holder for this preprint (which was not certified by peer review) is the author/funder, who has granted medRxiv a license to display the preprint in perpetuity. It is made available under a [CC-BY 4.0 International license](https://creativecommons.org/licenses/by/4.0/).
